# Supplementary material
Source: Research Square preprint supplement (doi:10.21203/rs.3.rs-8712240/v1)

**A**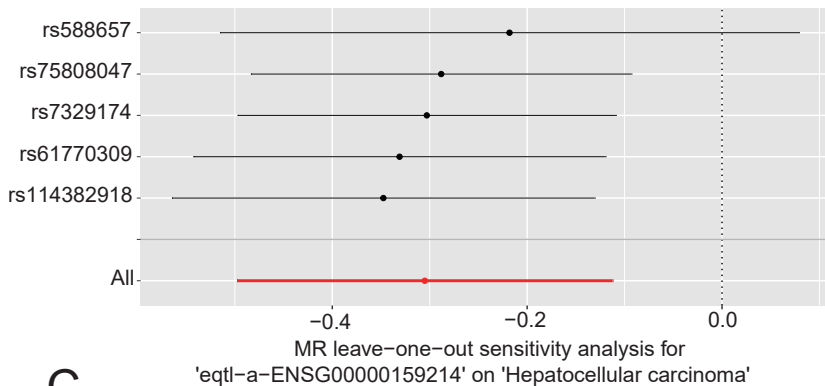**B**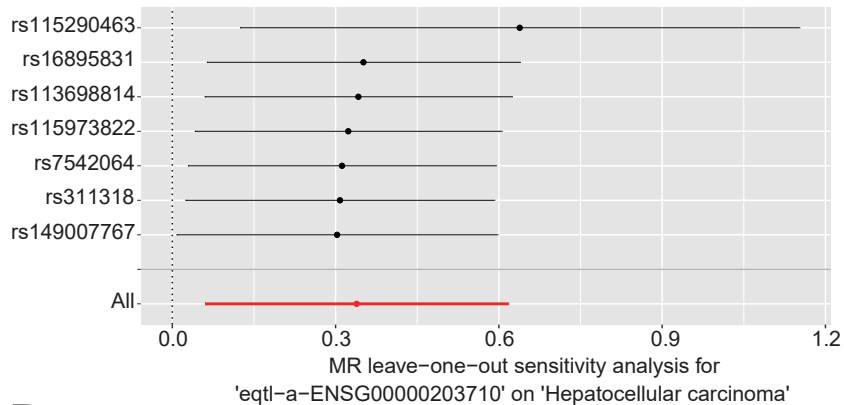**C**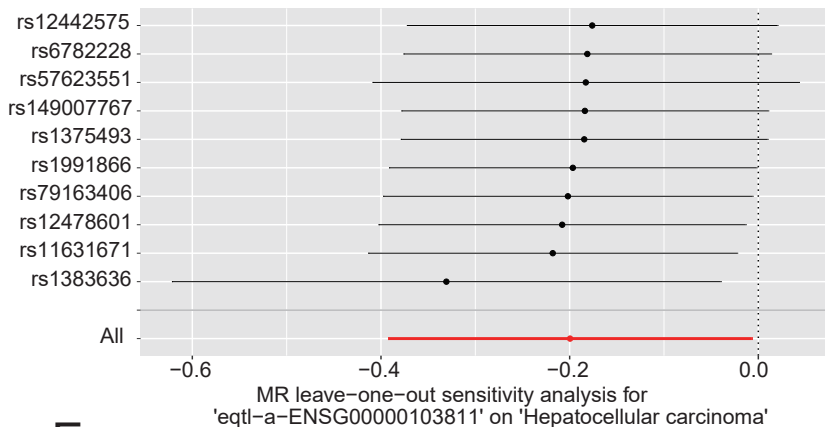**D**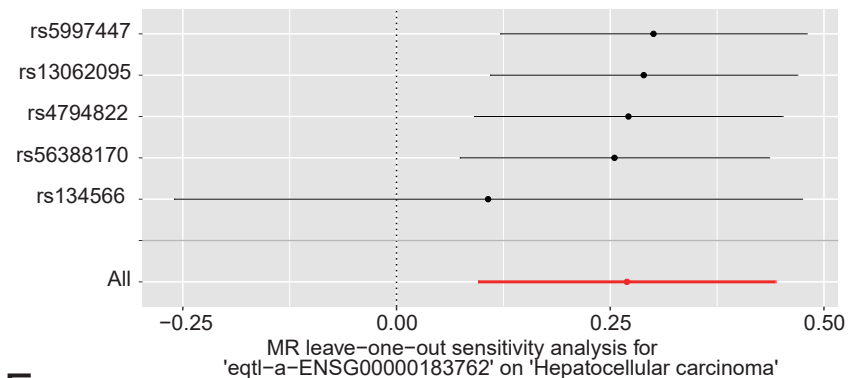**E**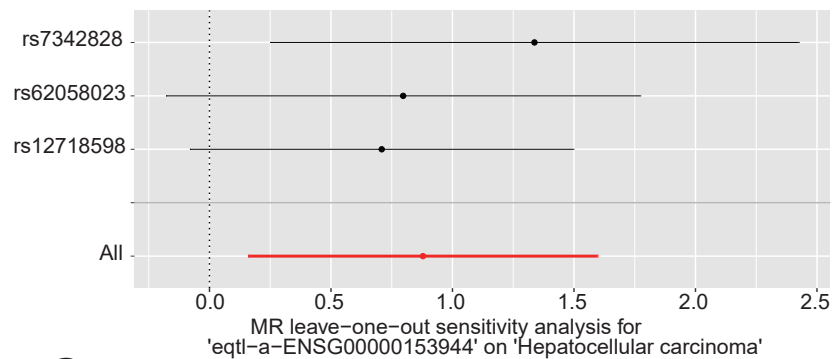**F**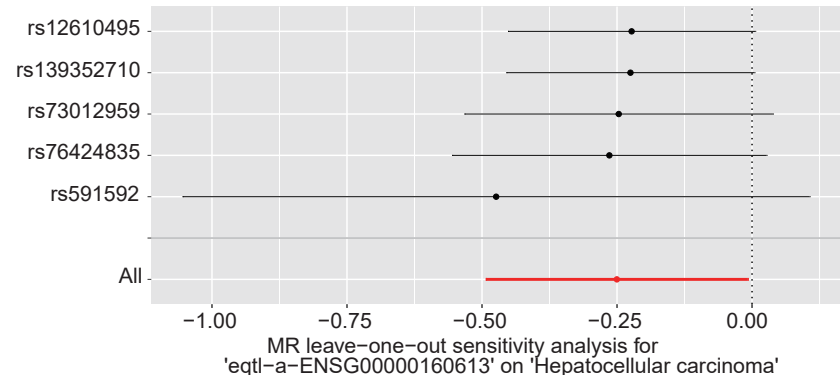**G**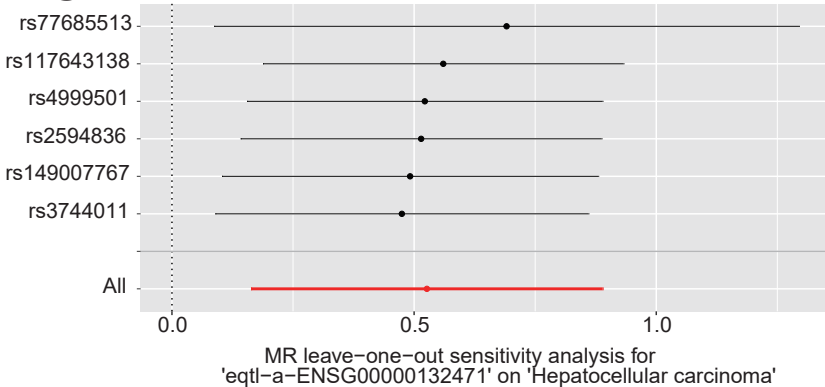**H**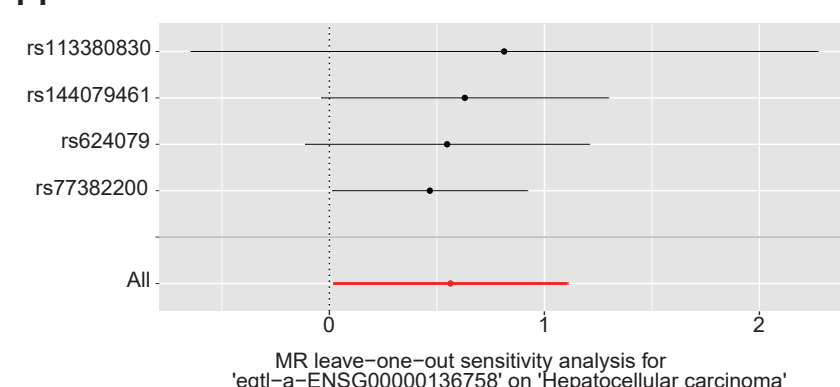

Supplement: Supplementary file [file 9d8fd14e61f09af212998660.pdf]
